# Supplementary material
Source: PubMed Central journal article supplement (PMC6917527)
Supplement: NIHMS1528004-supplement-16.pdf [file NIHMS1528004-supplement-16.pdf]

**A**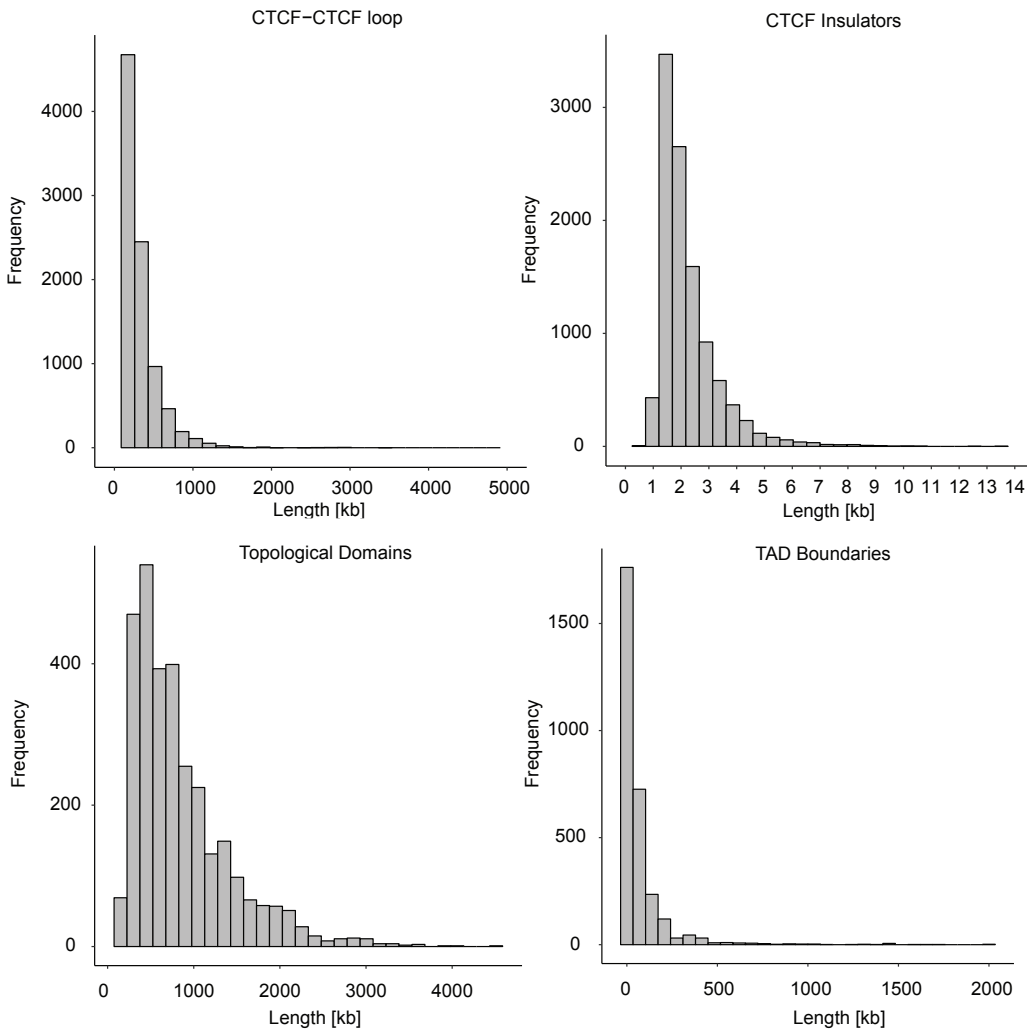**B**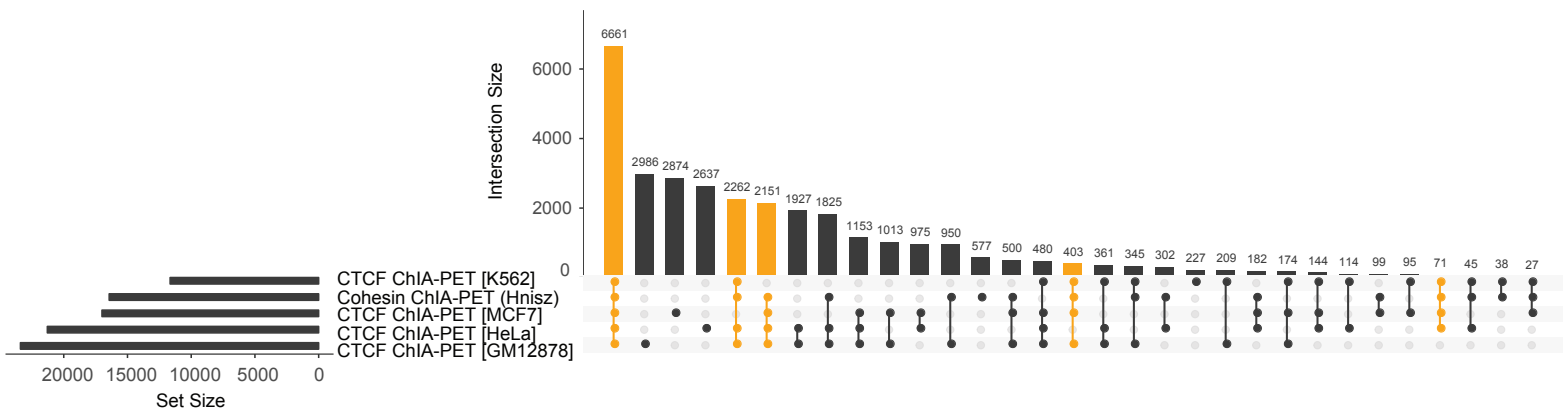**Figure S1. Details of CTCF/cohesin insulators, Related to Figure 1**

(A) Length distributions shown for insulators, CTCF-CTCF loops, TADs and TAD boundaries. The median length of insulators is 2 kb. (B) Upset plot to represent the number of overlapping CTCF/cohesin insulators between CTCF ChIA-PET and cohesin ChIA-PET data. Yellow colors represent the conserved constitutive CTCF/cohesin insulators used in this study.

### A Predicted CTCF motif-disruption due to SNVs

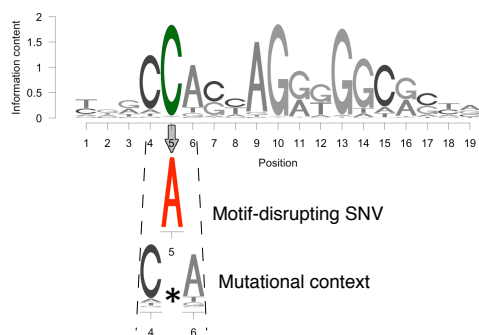

### B Fraction of CTCF motif disrupted per cancer type

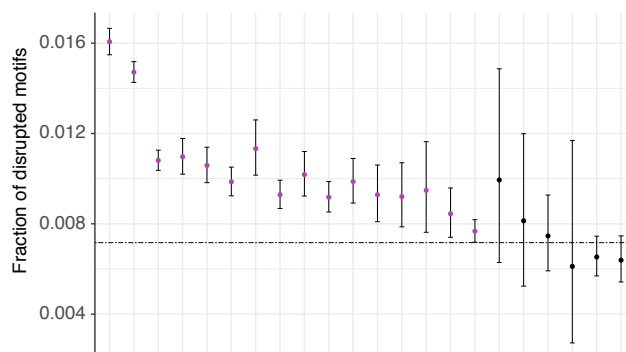

### C Tri-nucleotide distribution of CTCF motif-disrupting mutations

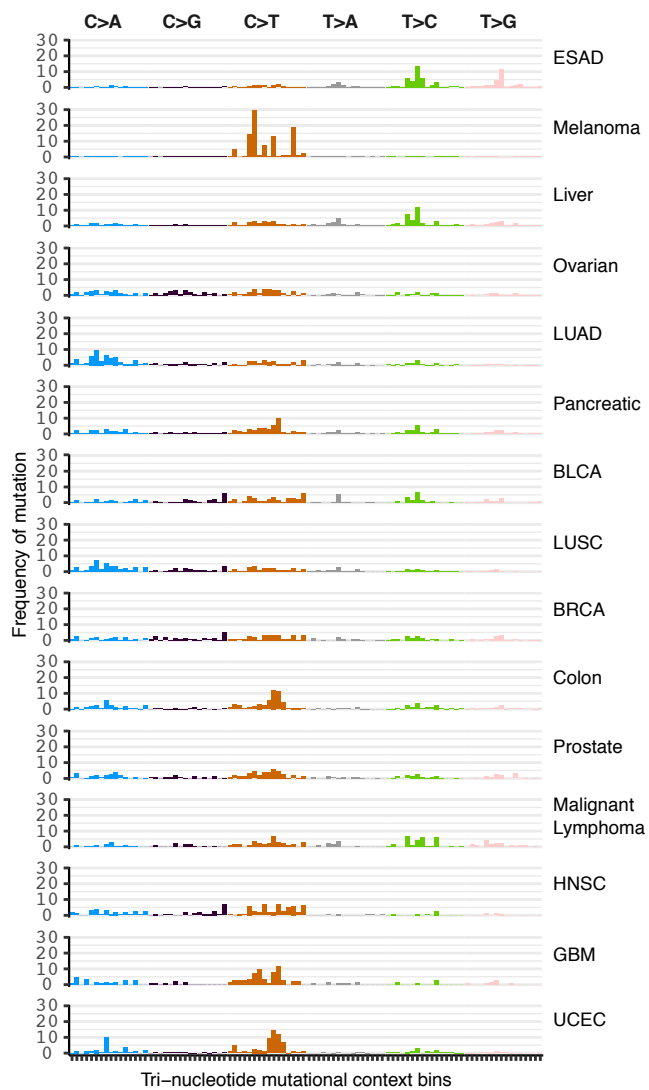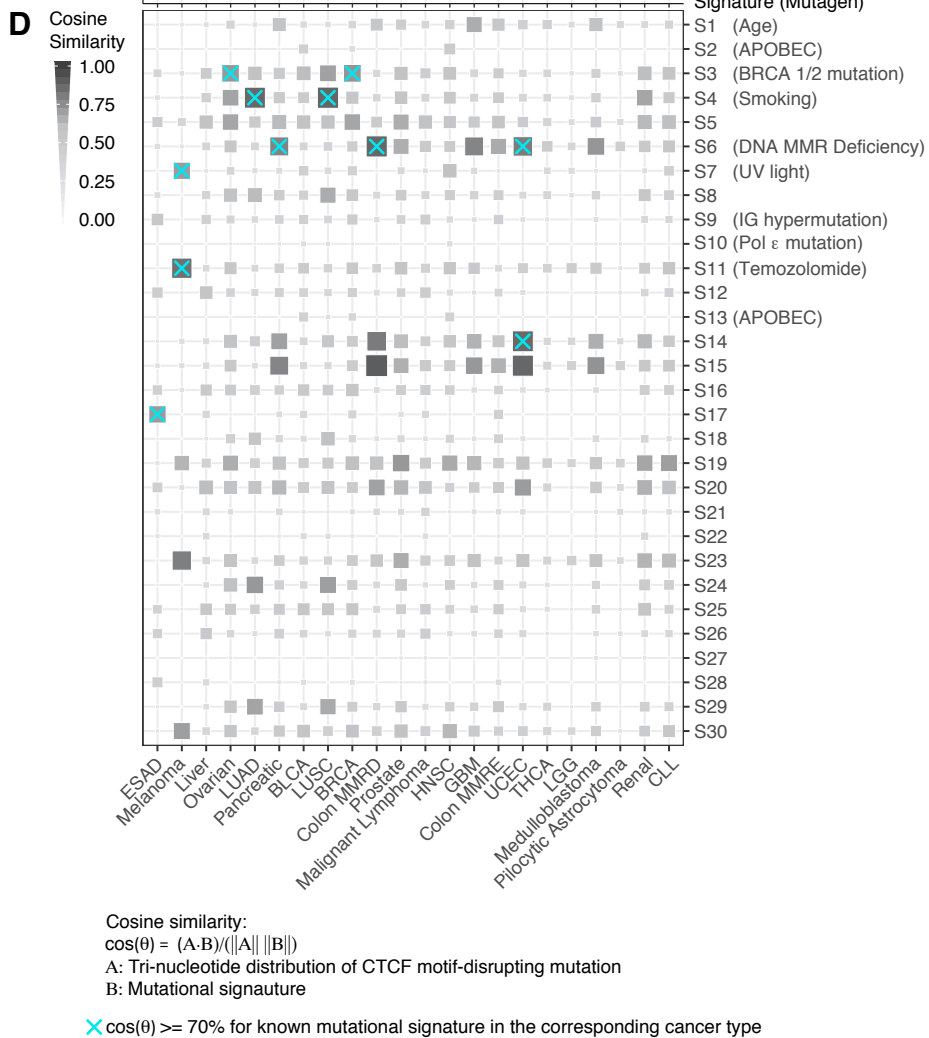

## Figure S2. CTCF motif-disrupting mutations, Related to Figure 1

(A) Schematic representation of a SNV predicted to disrupt CTCF motifs and its tri-nucleotide context. (B) Fraction of disrupted CTCF motifs relative to total disrupted motifs for all transcription factors (TFs). Horizontal dashed line is the proportion of CTCF motifs among the total number of TF motifs within ENCODE ChIP-Seq or DHS peaks. Purple is for cancer types showing significant enrichment of disrupted CTCF motifs. Colon cancer samples are divided into mismatch-repair-deficient (MMRD) and mismatch-repair-efficient (MMRE). (C) Observed tri-nucleotide distribution of CTCF motif-disrupting mutations for each cancer type. (D) Matrix depicting cosine similarity between the CTCF motif-disrupting distributions per cancer type and the COSMIC mutational signatures. Bigger size and darker color of the grey square-points indicates higher similarity. Cosine similarity  $\geq 70\%$  with mutational signature reported for the corresponding cancer type is denoted by blue cross. Mutations at all CTCF binding sites were considered for this analysis. BLCA: Bladder urothelial carcinoma; GBM: Glioblastoma; LGG: Lower grade glioma; BRCA: Breast invasive carcinoma; CLL: Chronic lymphocytic leukemia; UCEC: Uterine corpus endometrial carcinoma; ESAD: Esophageal adenocarcinoma; HNSC: Head and Neck squamous cell carcinoma; LUAD: Lung adenocarcinoma; LUSC: Lung squamous cell carcinoma; THCA: Thyroid carcinoma.

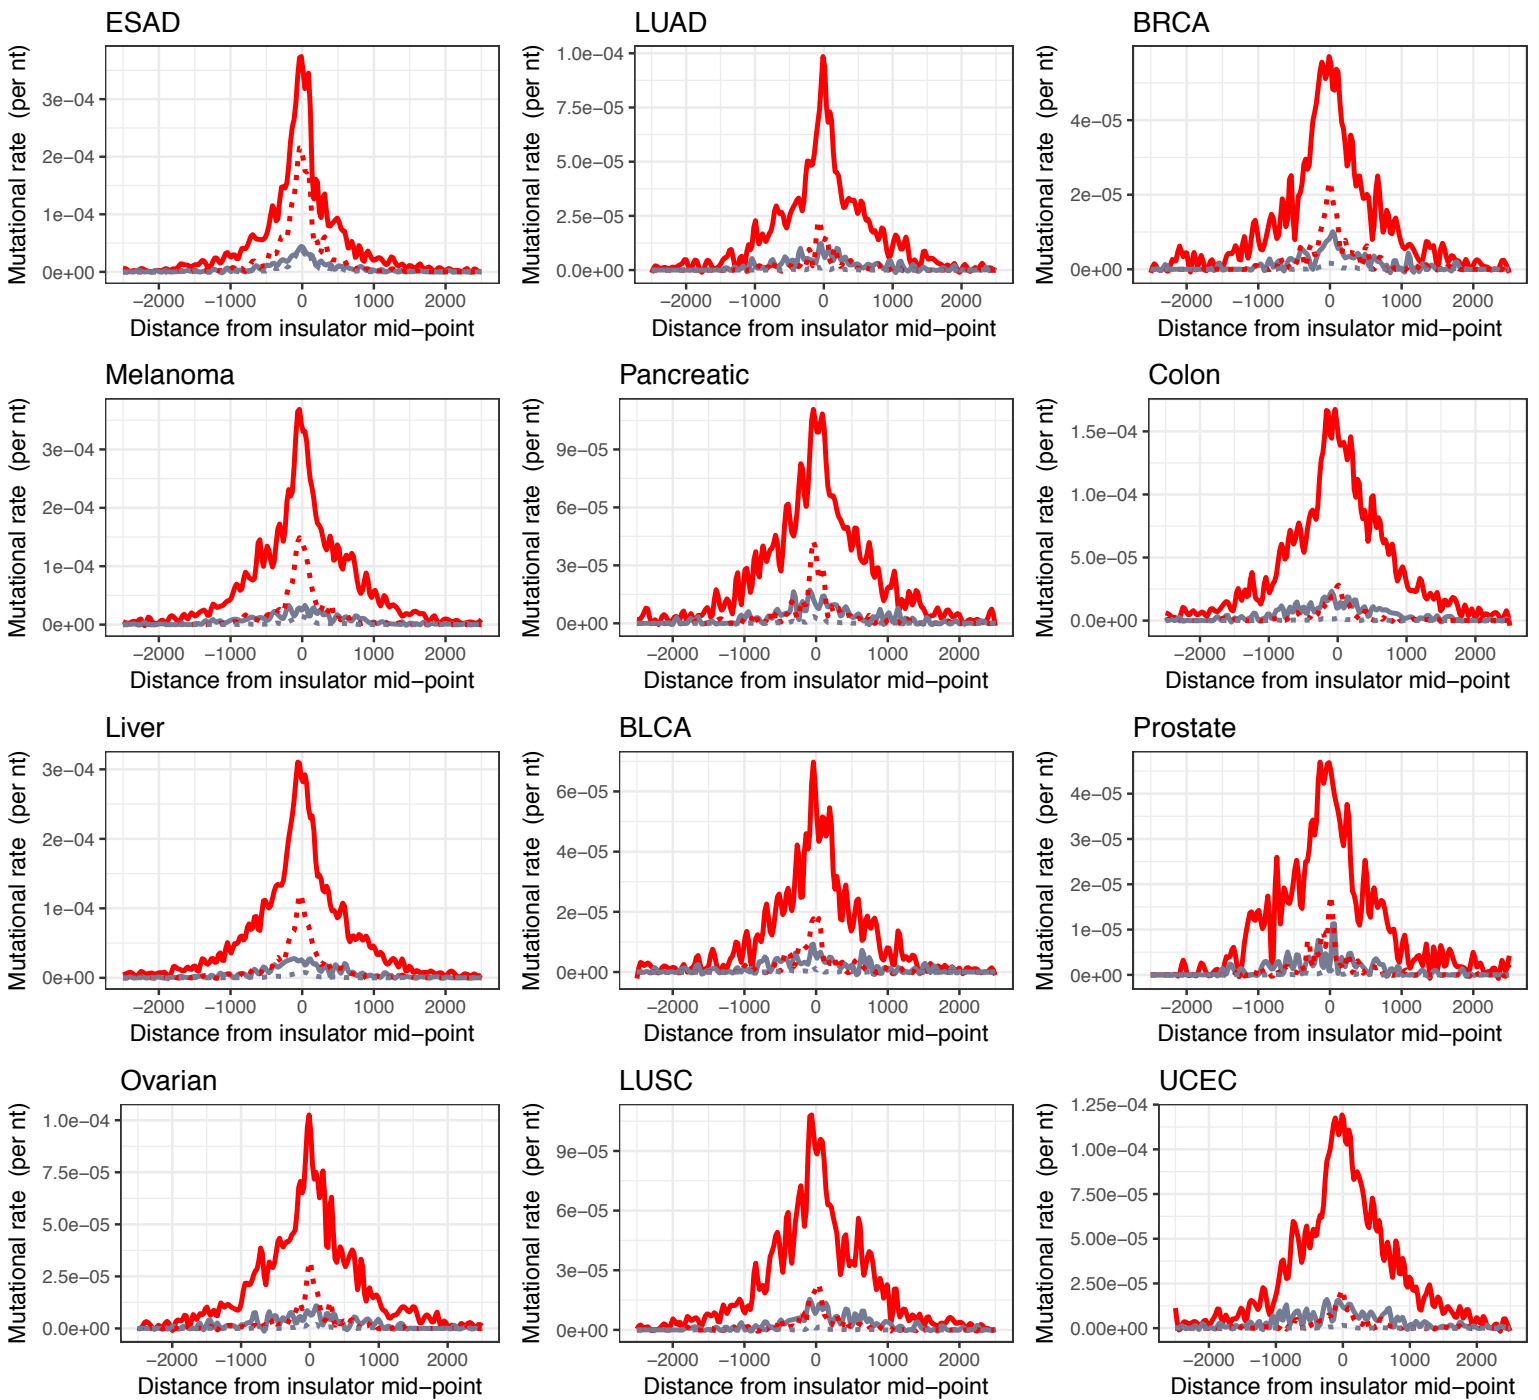

**Figure S3. Aggregate mutation rate at CTCF motifs within insulators, Related to Figure 1**

For each panel the solid red line represents the observed rate of mutations that disrupt CTCF motifs and dotted red line represents the expected rate. The observed rate is higher than expected for all cancer types. For comparison, the observed rate of mutations that are not predicted to disrupt CTCF motifs is shown by solid grey lines and the dotted grey corresponds to their expected rate. Only cancer types with more than 500 mutations predicted to cause CTCF motif-disruption within insulator regions are shown.



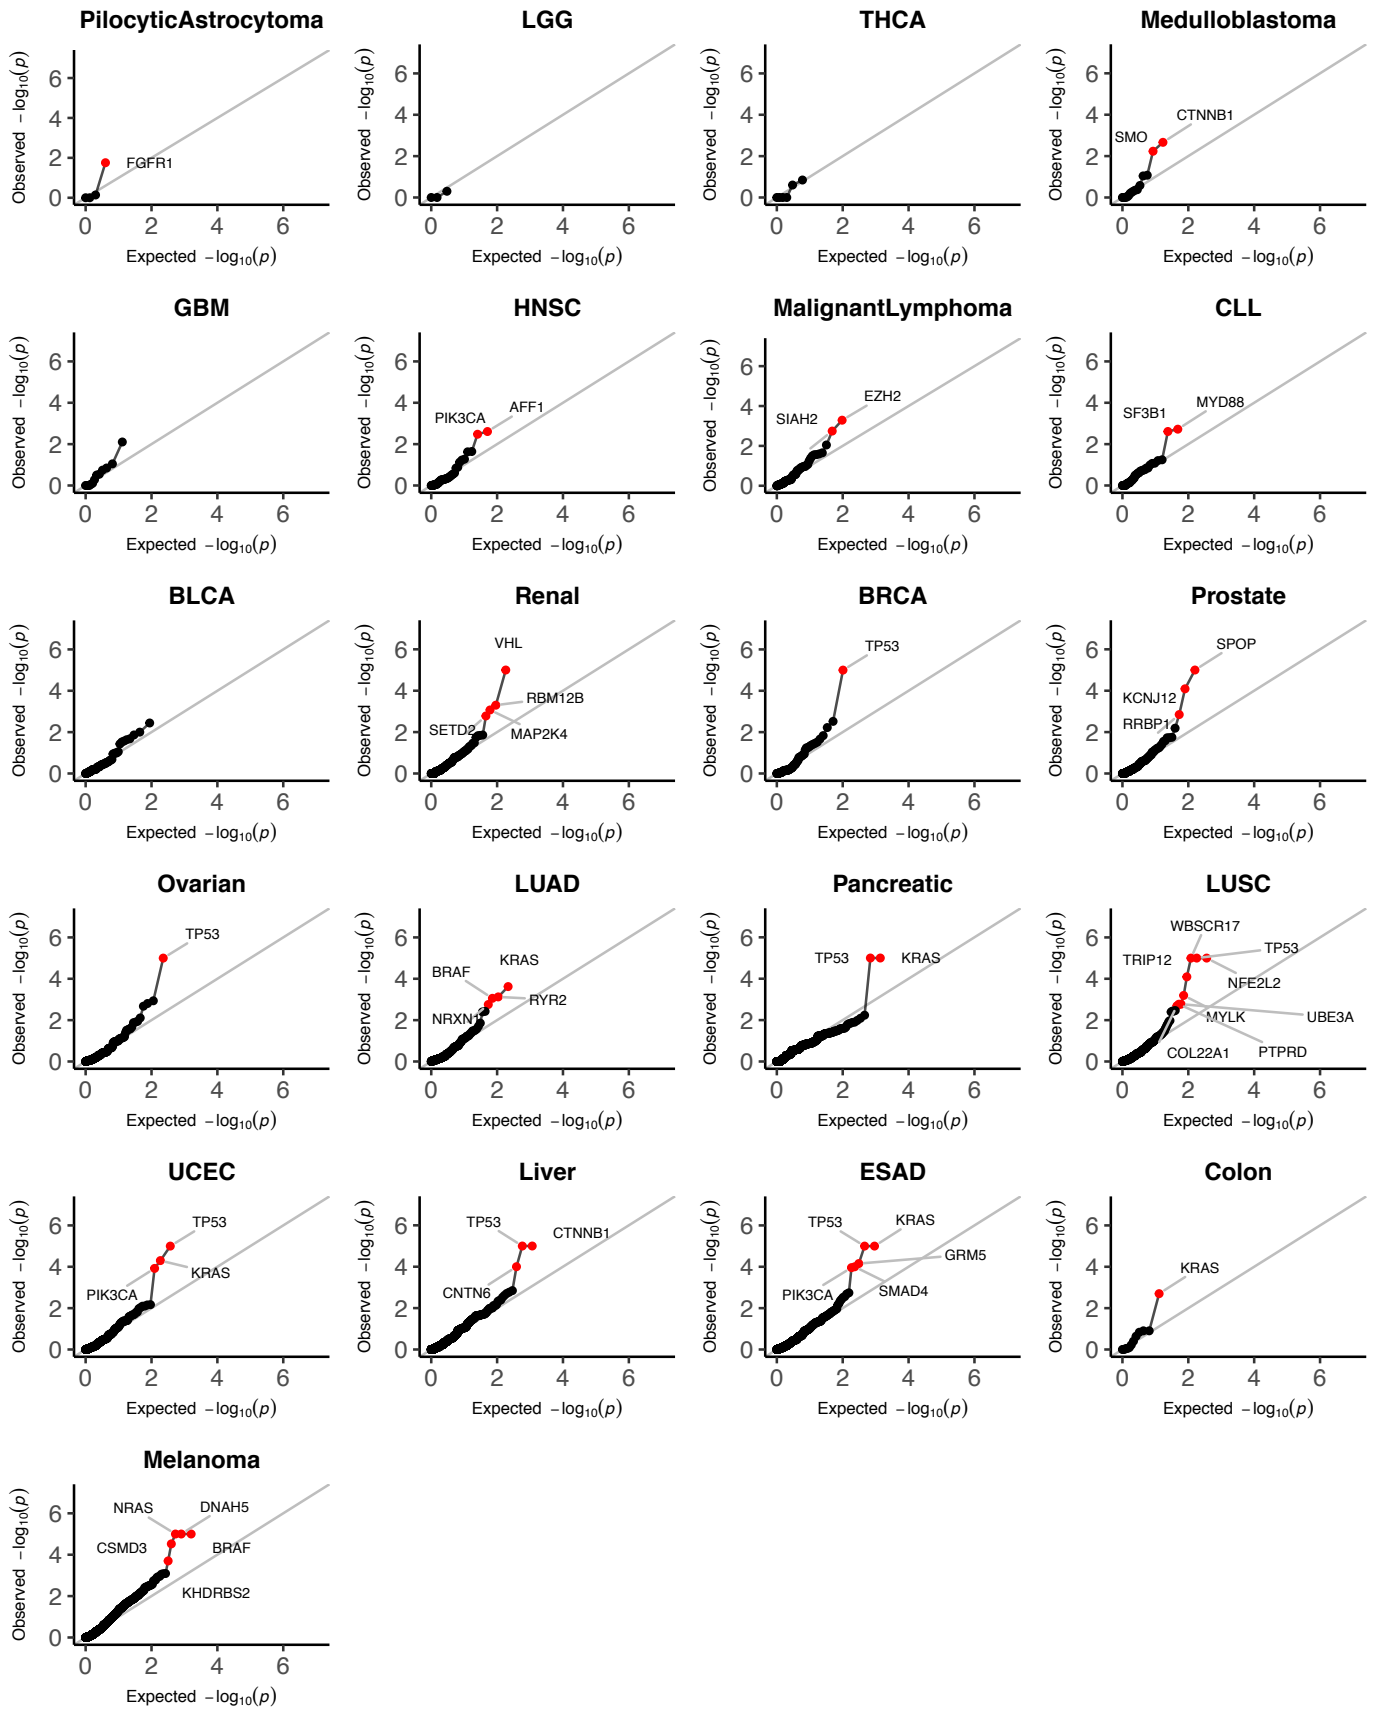

**Figure S4. QQ plots of coding sequence (CDS) from CNCDriver, Related to Figure 1**  
 QQ plots of CDS showing expected versus observed P values from CNCDriver. Candidates with Q value  $\leq 0.1$  are labeled and shown in red.

**A**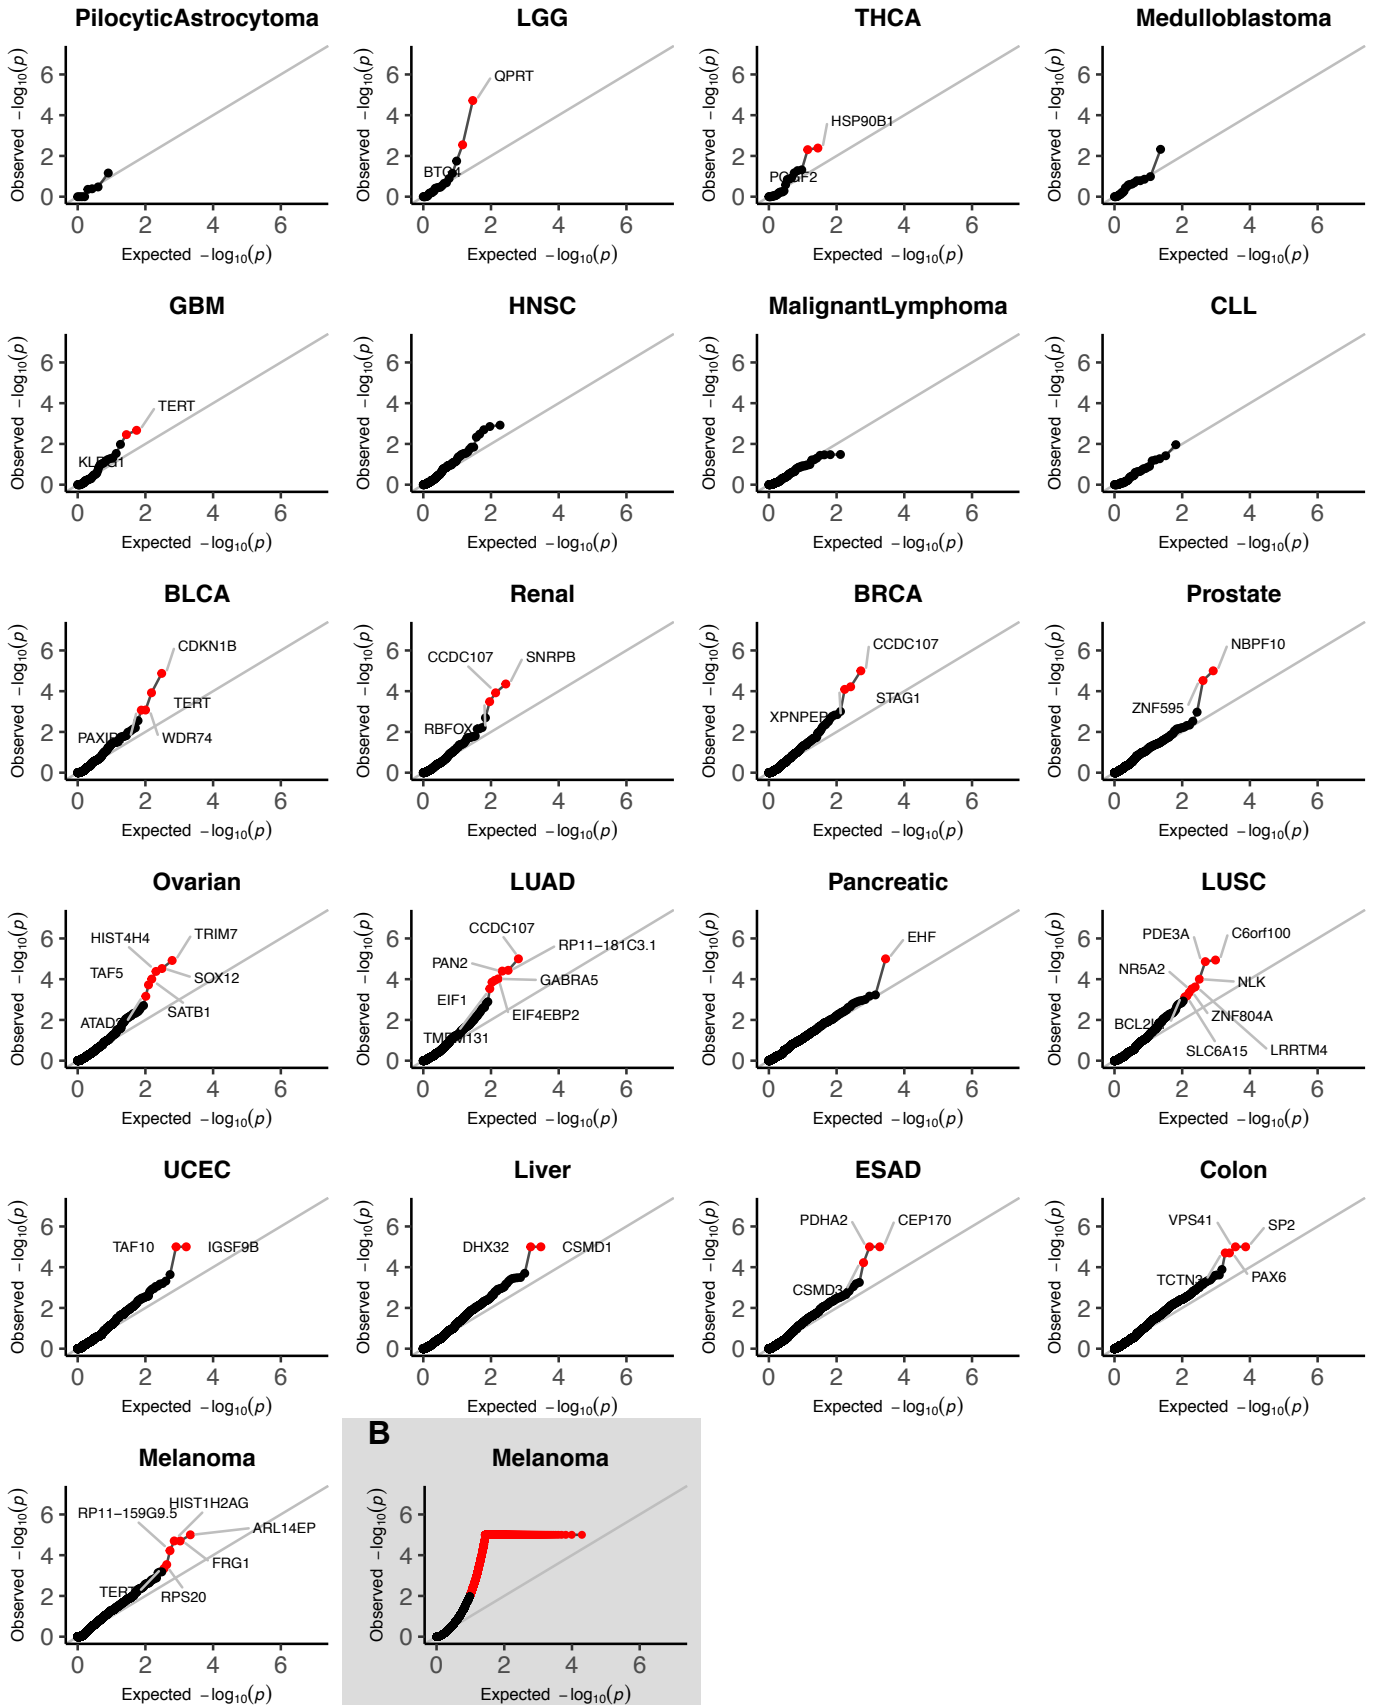

**Figure S5. QQ plots of promoters, Related to Figure 1**

(A) CNCDriver results: QQ plots of promoters showing expected versus observed P values from CNCDriver. Candidates with Q value  $\leq 0.1$  are labeled and shown in red. In melanoma, KDM5A, RPL13A, GDAP1, RPL34 were further filtered due to extended TTCCG mutational signature (Fredriksson et al., 2017). (B) OncoDriveFML result: QQ plot of OncoDriveFML promoter result in melanoma. Candidates with Q value  $\leq 0.1$  are shown in red. OncoDriveFML predicted 2,057 significant candidates with Q value  $\leq 0.1$ . Lambda value is 2.771 vs. the value of 1.313 for melanoma QQ plot from CNCDriver.

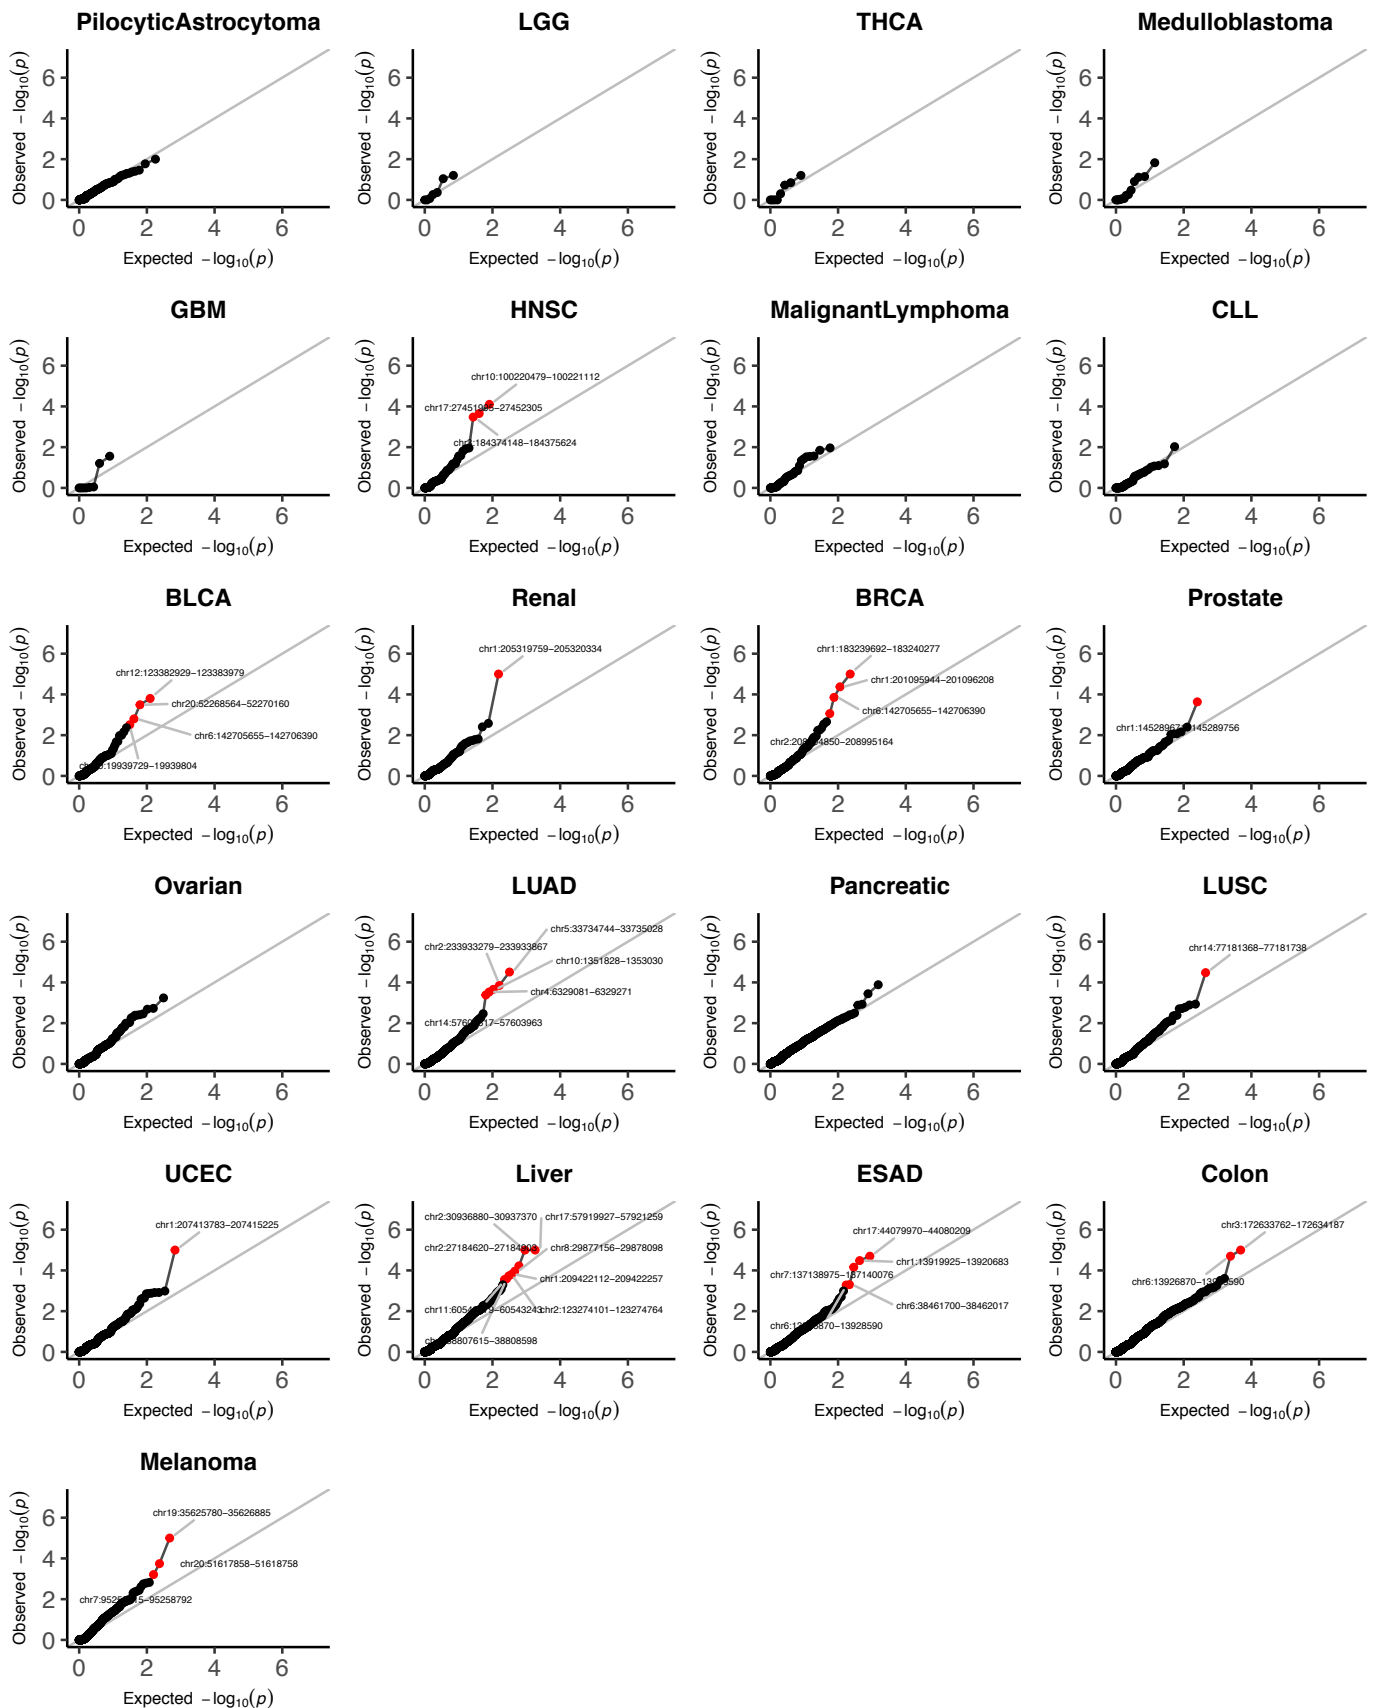

**Figure S6. QQ plots of enhancers from CNCDriver, Related to Figure 1**  
 QQ plots of enhancers showing expected versus observed P values from CNCDriver. Candidates with Q value  $\leq 0.1$  are labeled and shown in red.

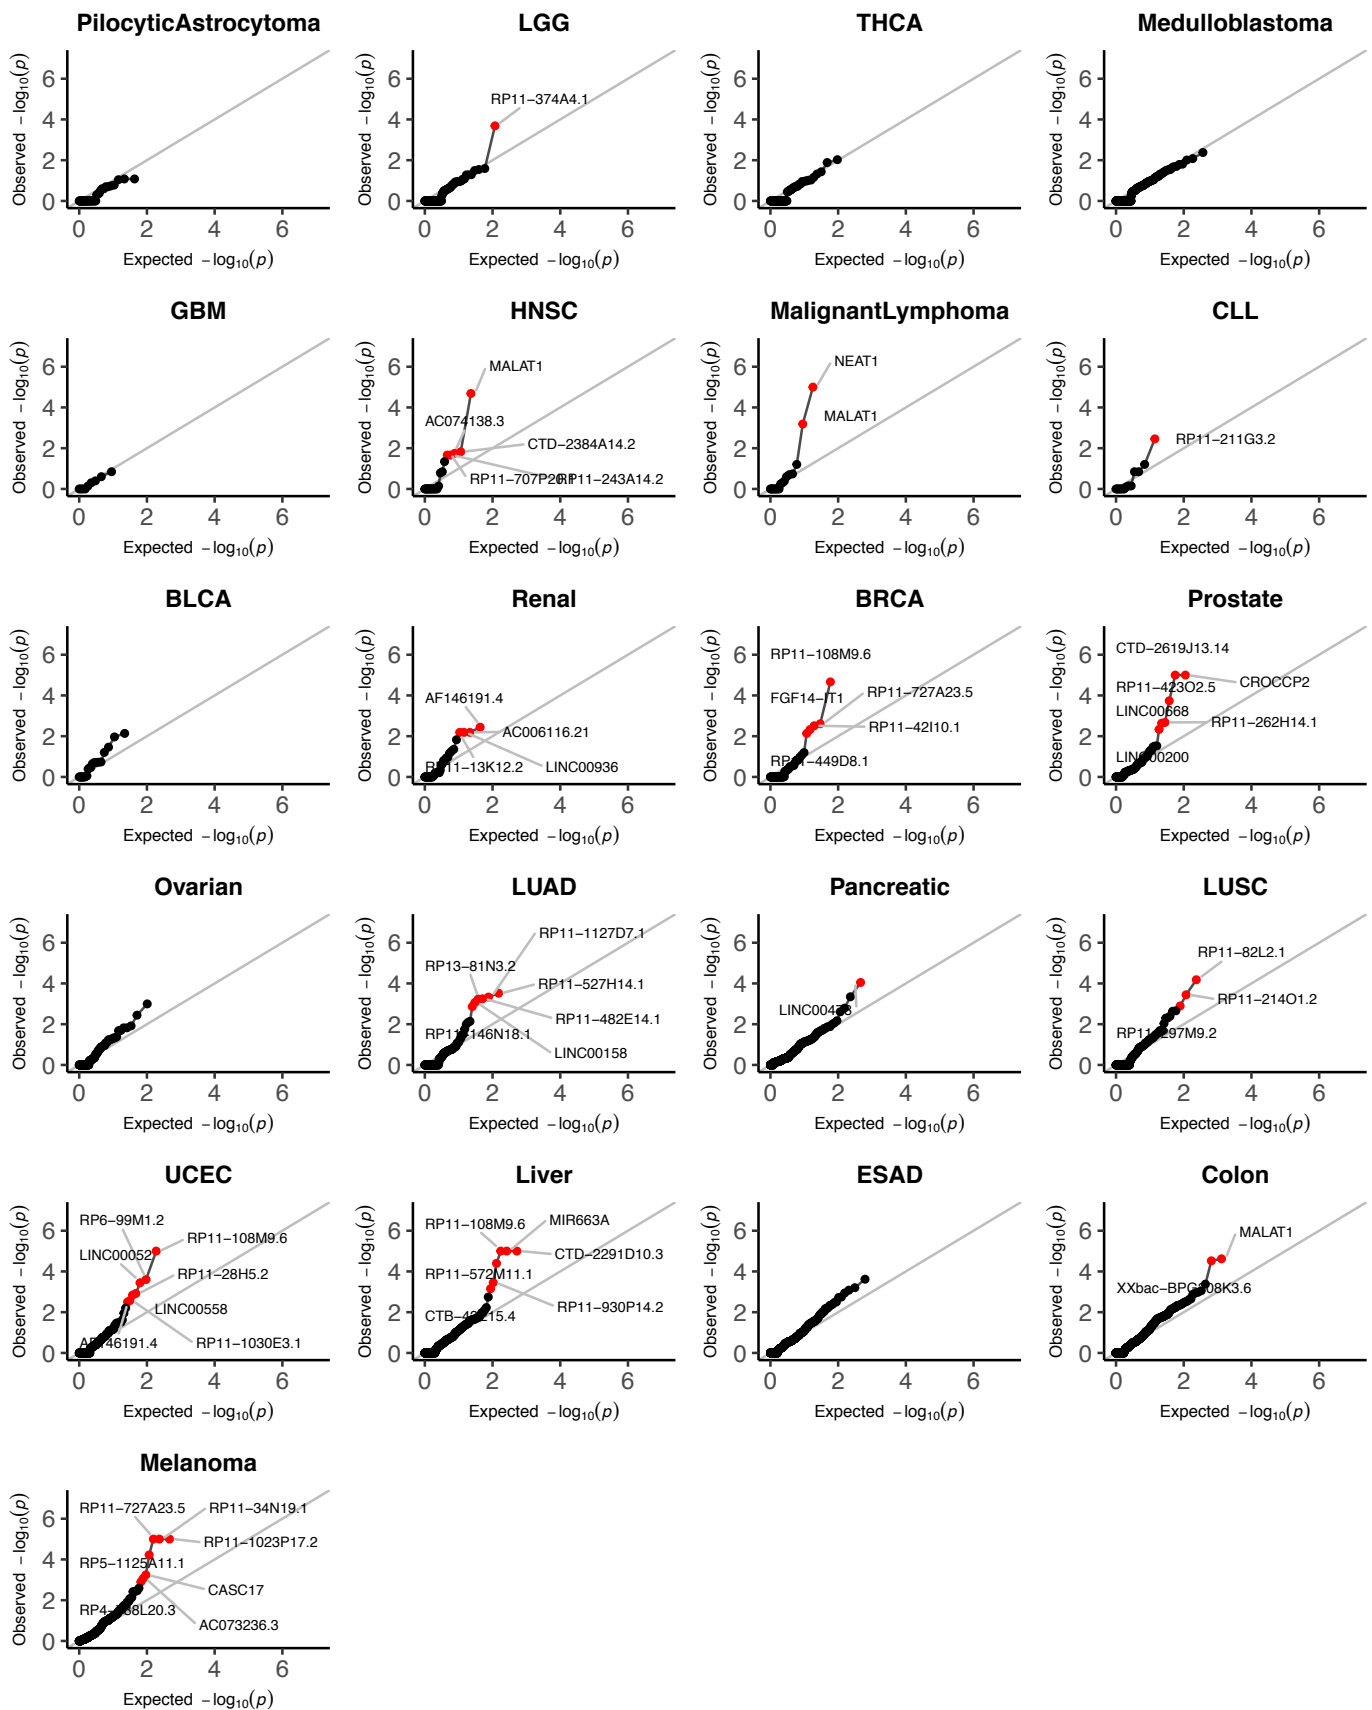

**Figure S7. QQ plots of lincRNAs from CNCDriver, Related to Figure 1**

QQ plots showing expected versus observed P values from lincRNA results of CNCDriver. Candidates with Q value  $\leq 0.1$  are labeled and shown in red. We note that NEAT1 and MALAT1 show enrichment of mutations due to AID somatic hypermutation in malignant lymphoma and their mutations are likely not drivers.

**A**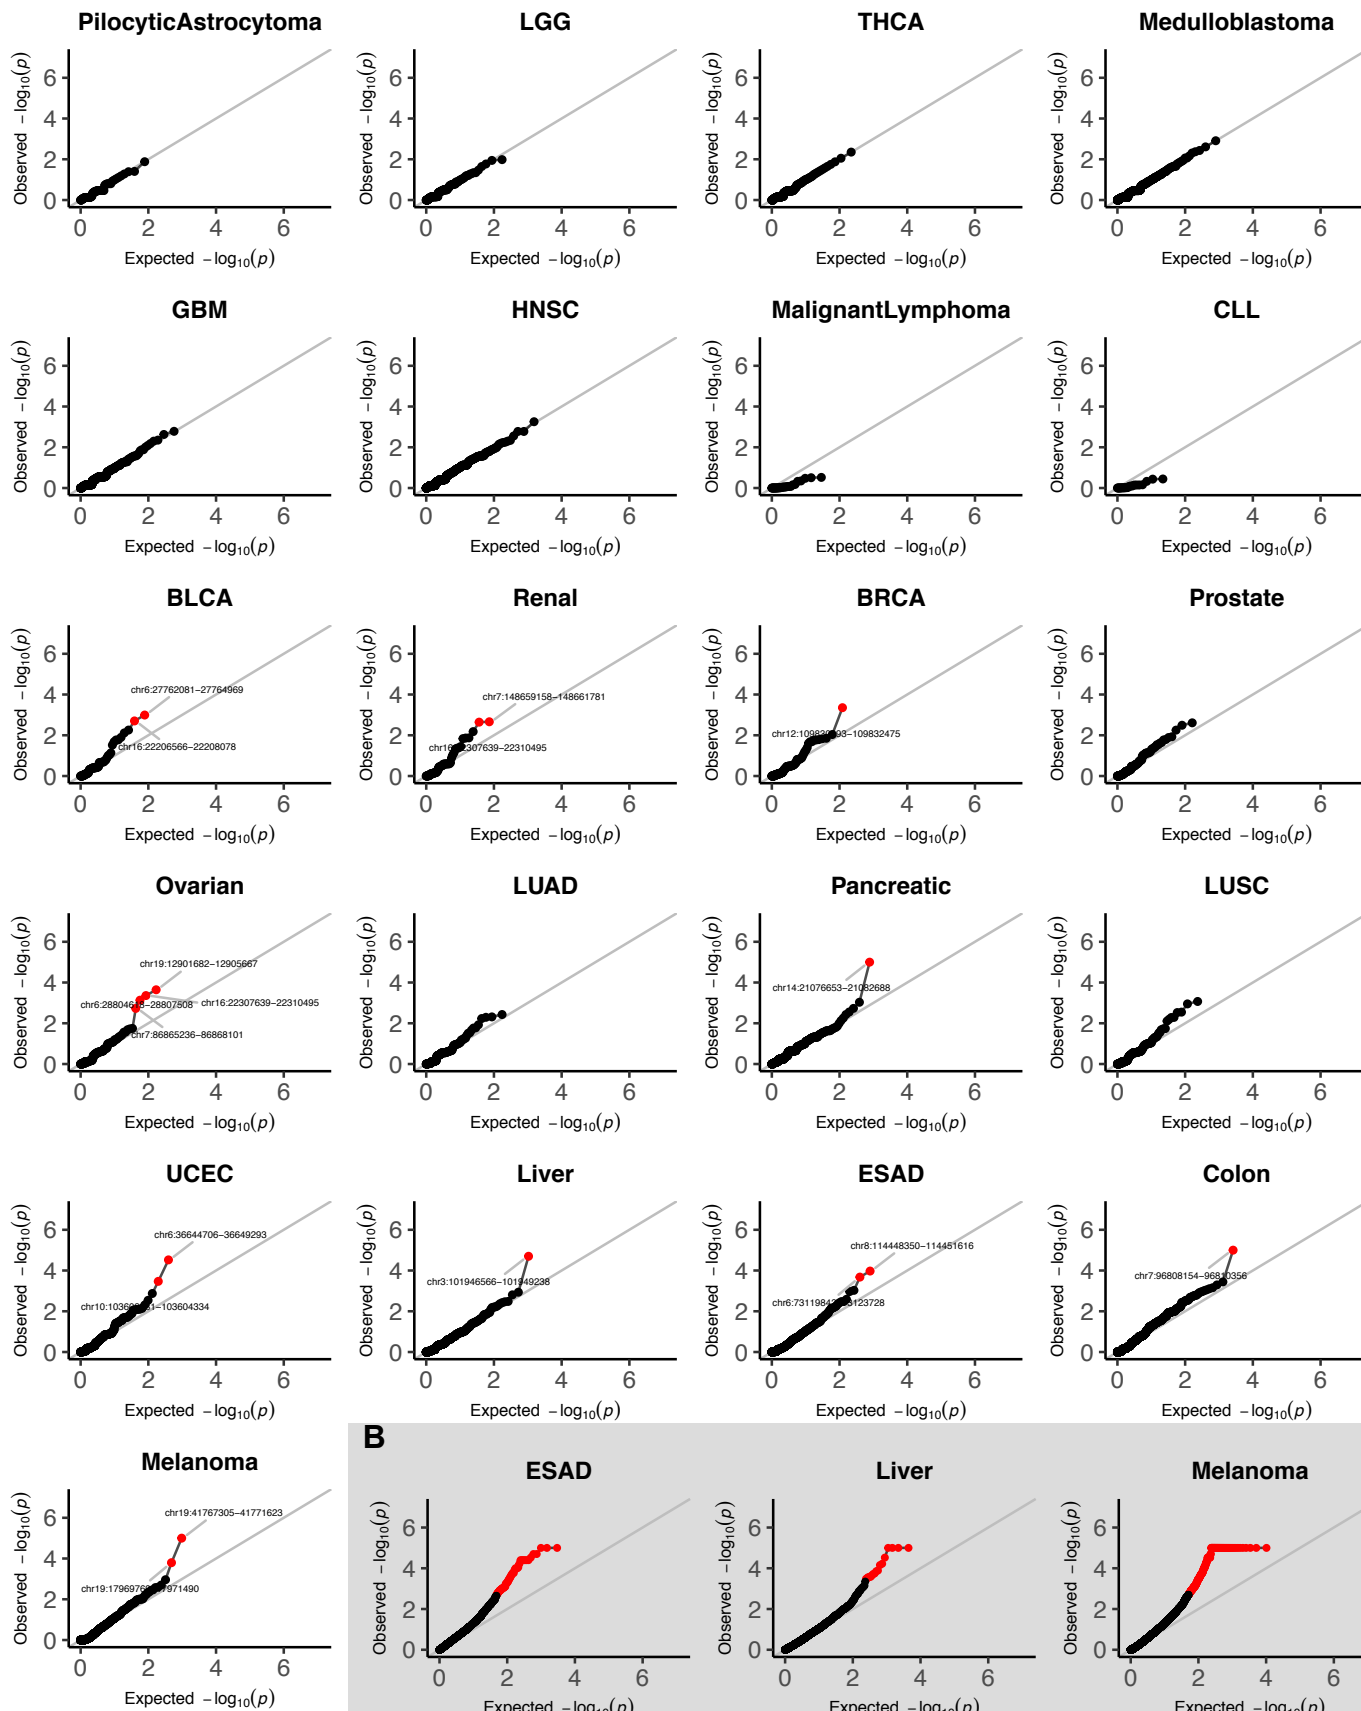

**Figure S8. QQ plots of CTCF/cohesin insulators, Related to Figure 1**

(A) CNCDriver results: QQ plots show p-values follow a uniform distribution. Candidates with Q value  $\leq 0.1$  are labeled and shown in red. 10 out of 21 cancer types show at least one significantly mutated insulator. (B) OncoDriveFML results: QQ plots shown for the three cancer types with highest enrichment of disrupted CTCF motifs (see Figure S2B). Candidates with Q value  $\leq 0.1$  are shown in red. Inflated QQ plots observed for esophageal cancer (ESAD) with 61 significant candidates, melanoma with 201 significant candidates and liver cancer with 18 significant candidates.

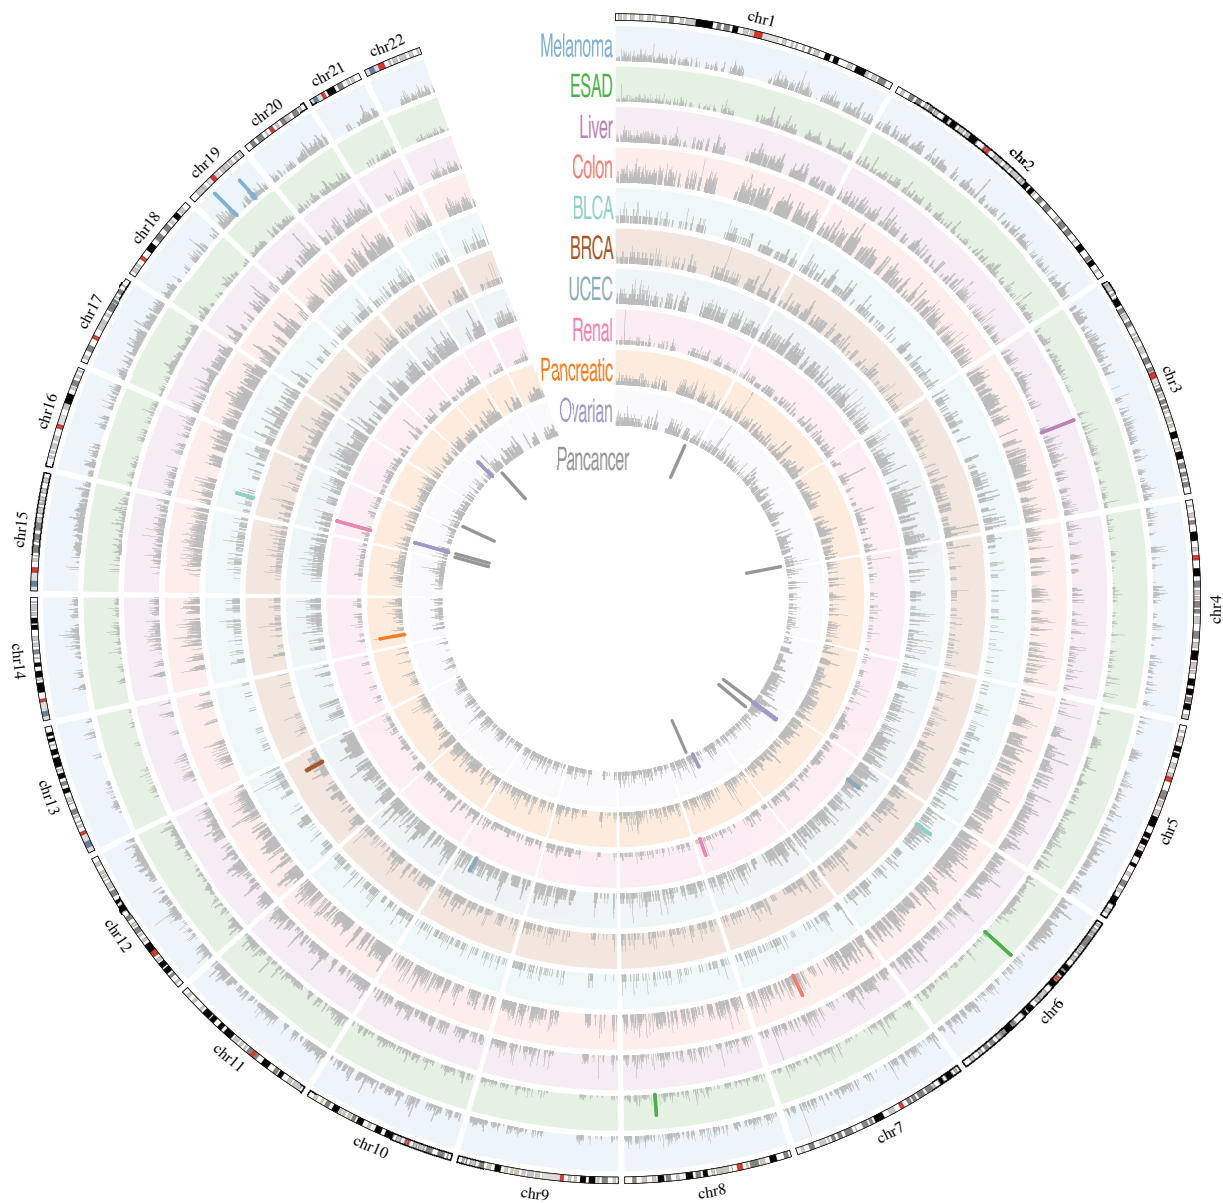

**Figure S9. Landscape of mutation rate in insulators, Related to Figure 1**

Complete landscape view for the fraction of mutated samples per insulator along the genome shown in the circos plot (light grey bars). The scale corresponds to the maximum fraction of mutated samples for each cancer type (up to 36% in Melanoma, 24% in BLCA, 21% in Colon, 18% in ESAD, 15% in UCEC, 13% in LUAD, 10% in Ovarian, 9% in Renal, 4% in BRCA, 7% in Liver and 5% in Pancreatic). CNCDriver identifies significantly mutated insulators that are highlighted as thicker bars in the corresponding cancer's color and in dark grey for pan-cancer analysis. In total, there are 21 significantly mutated insulators.



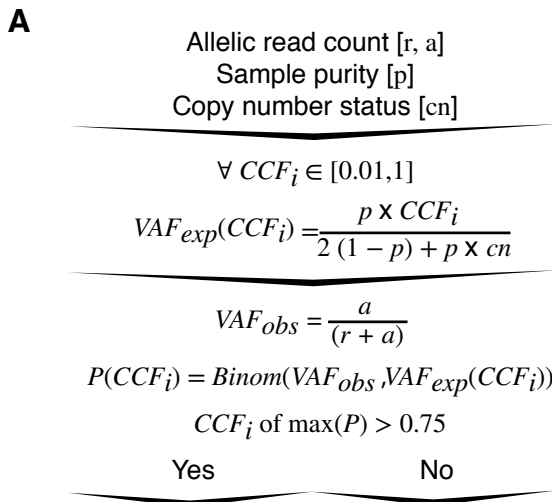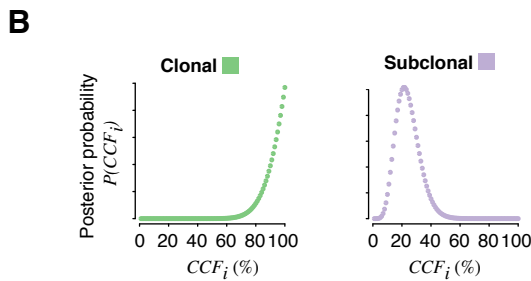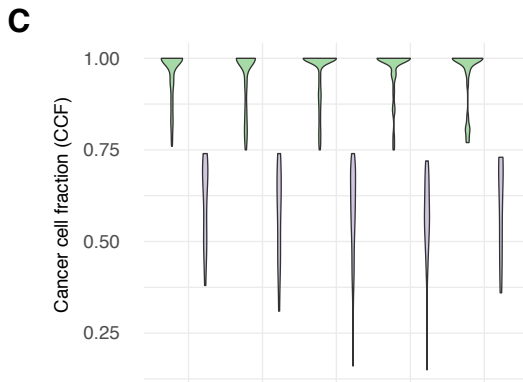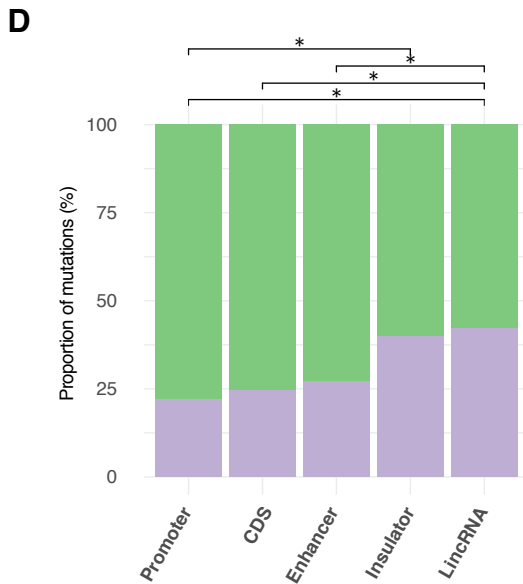

**Figure S10. Clonality status of the mutations in the candidates predicted by CNCDriver, Related to Figures 1**

(A) Workflow to assess the clonality status. Reference allelic read counts [r], alternative allelic read counts [a], cancer cell fraction [CCF<sub>i</sub>] within the uniform vector of 100 i values [0.01, 1], expected variant allelic fraction [VAF<sub>exp</sub>] given purity [p] and copy number [cn], [VAF<sub>obs</sub>] observed variant allele fraction given allelic read count. (B) Examples of posterior probability curve for clonal and subclonal mutations. For clonal mutations, the posterior probability curve tends to support higher CCF for a given mutation VAF<sub>obs</sub>. For subclonal mutations, for a given mutation VAF<sub>obs</sub>, lower CCF has higher probability in the posterior probability curve. (C) CCF distribution for mutations in candidates for each element: promoter, coding sequence (CDS), enhancer, insulator and lincRNA. (D) Proportion of clonal and sub-clonal mutations in driver candidates for each element (Marked with \* p-value < 0.05, Fisher's exact test).

TAD  
 TAD boundary  
 Constitutive loop w/  
mutated boundary  
 Constitutive loop

Predicted loop  
 CTCF peak  
 Forward CTCF motif  
 Reverse CTCF motif

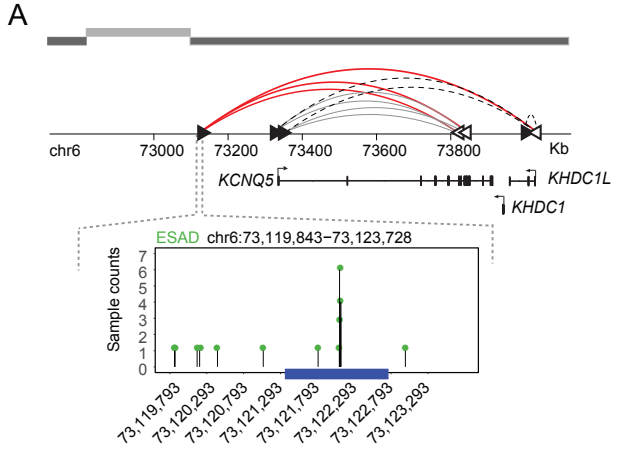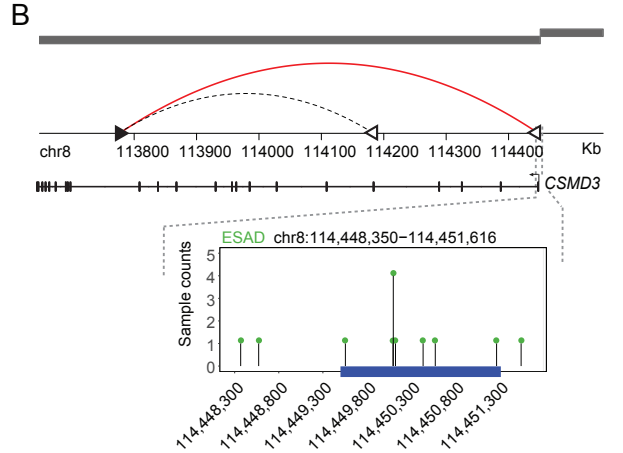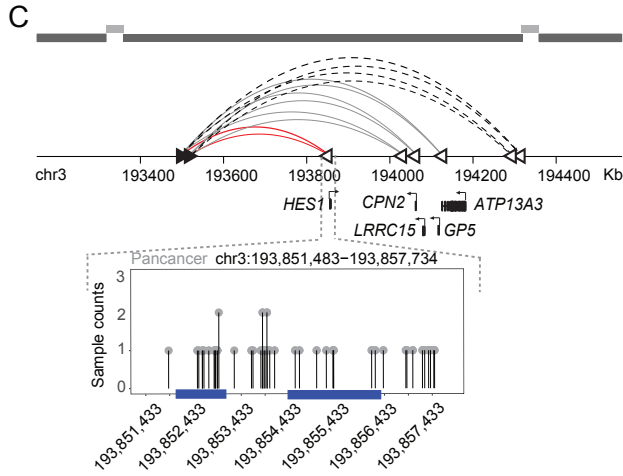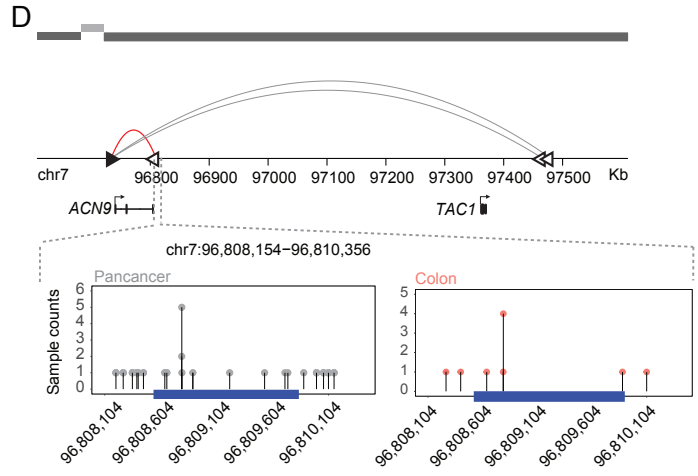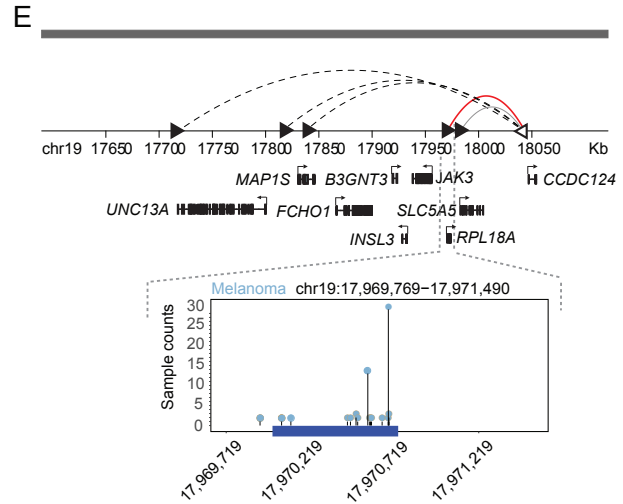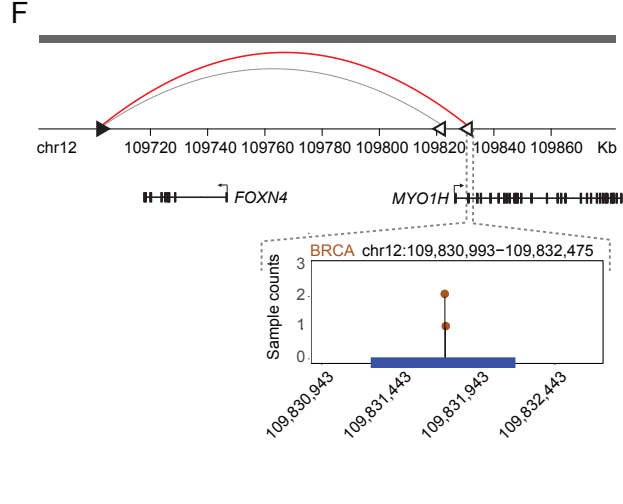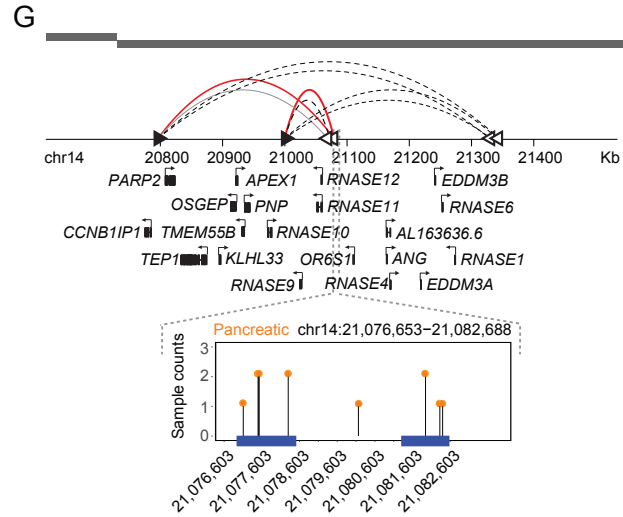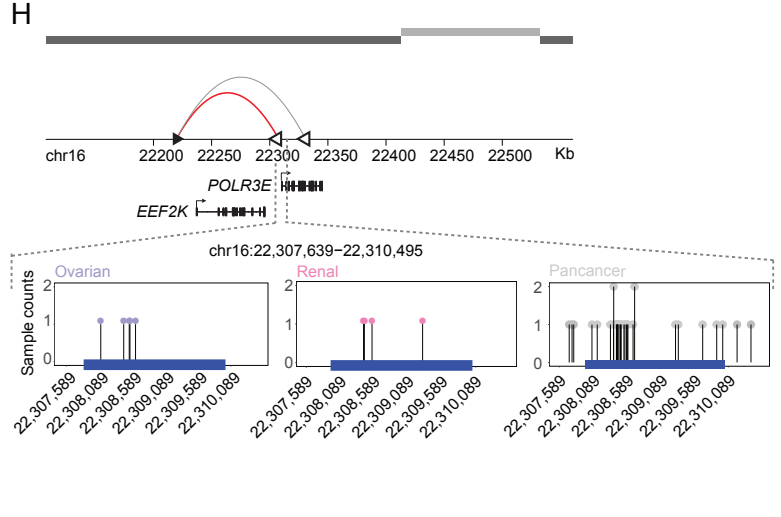

### **Figure S11. Mutations in predicted insulator drivers, Related to Figure 1**

(A-H) Top: Graphical representation of the possible new loops formation (gray: alternate loops, dotted: predicted loops) associated with significantly mutated insulators. Original CTCF-CTCF loops predicted to be disrupted are shown in red. Black solid triangle represents CTCF motif in the forward orientation and white triangle represents CTCF motif in the reverse orientation. Dark grey bars represent a topological associated domain (TAD) and light grey represent a TAD boundary. Bottom: Zoom-in needle plots to show the location of each mutation within the significantly mutated insulator and the number of mutated samples at each position. The regions of CTCF ChIP-seq peaks are labeled in blue color. Here, we show driver candidates with recurrent mutations in the insulator regions. 5 out of 21 predicted drivers do not contain CTCF motifs in the convergent orientation at original disrupted boundary pairs and were excluded from loop predictions. Detailed information of genes involved in the predicted loop-rewiring events is in supplementary table S8.

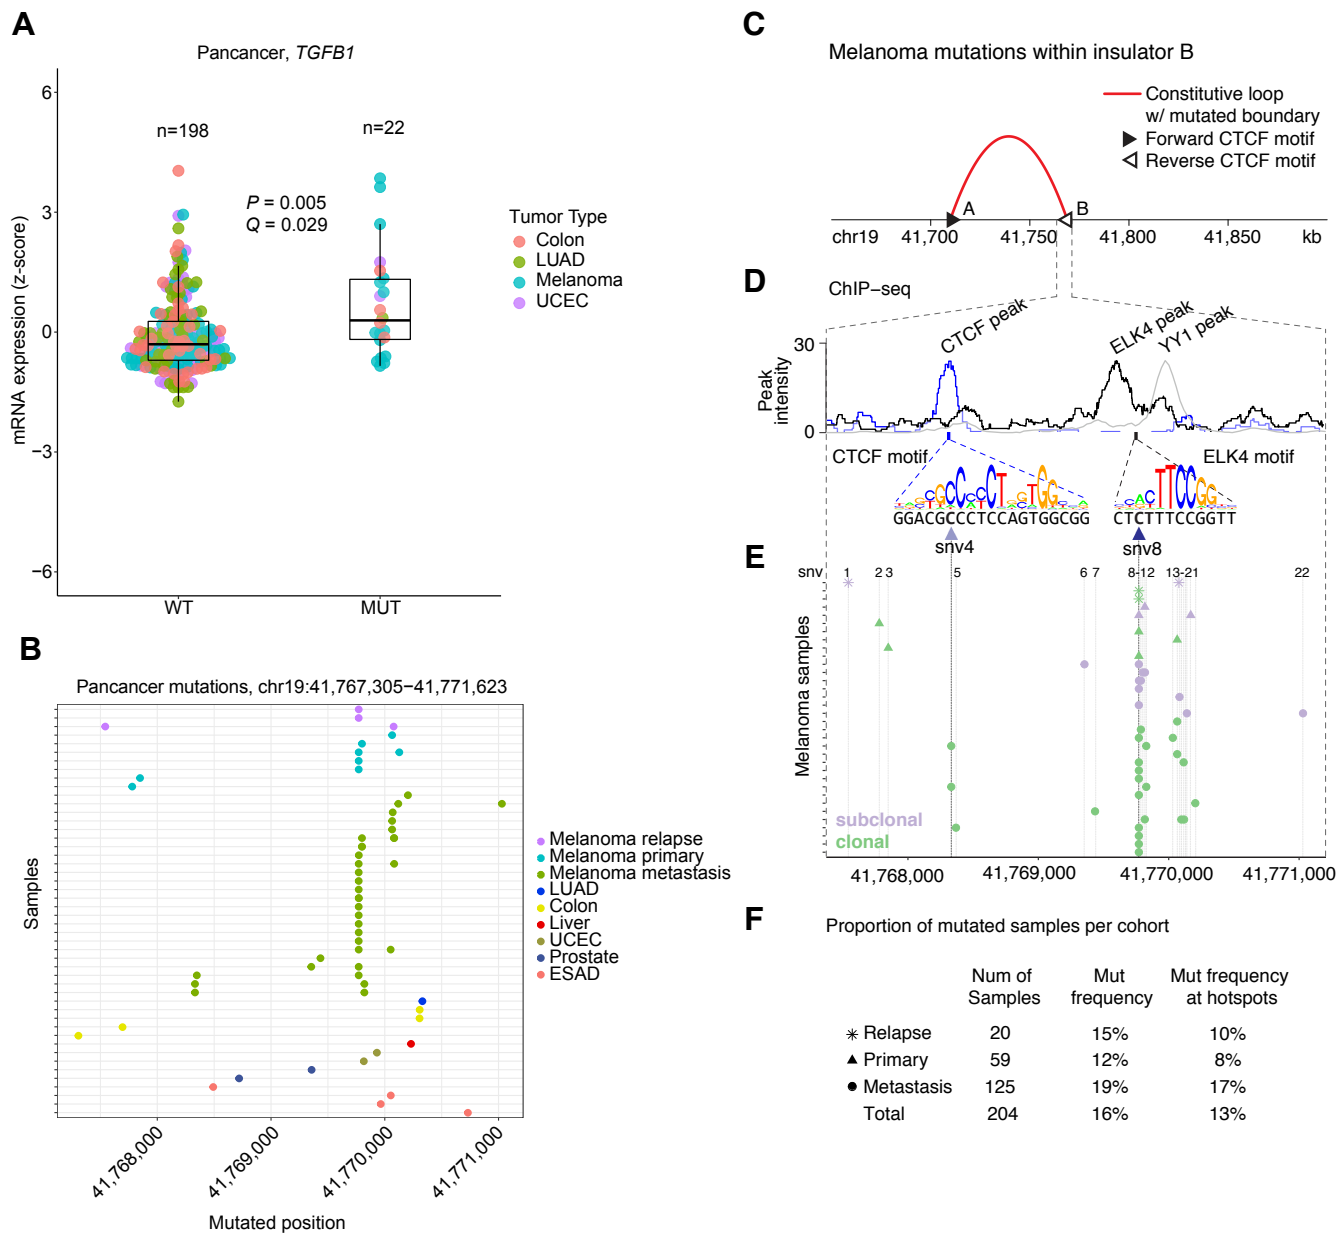

**Figure S12. Mutations in *TGFB1* associated insulator, Related to Figures 1 and 2**

(A) Box plot of *TGFB1* differential expression between tumor samples with mutations (MUT) and those without mutations (WT) in the significantly mutated insulator (chr19:41,767,305–41,771,623) in pan-cancer analysis. (B) The zoom-in to the significantly mutated insulator in pan-cancer analysis. (C) Loop conformation in A375 melanoma cells around the *TGFB1* associated insulator region B. (D) The zoom-in to the significantly mutated insulator B shows the corresponding CTCF peak and co-located ELK4 and YY1 peaks. Locations of the CTCF and ELK4 motifs are also shown. (E) Single nucleotide variant (SNV) positions are shown. SNVs are numbered starting from left to right. There are 7 hotspot positions (recurrently mutated in multiple samples) (chr19: 41,768,332; 41,769,771; 41,769,772; 41,769,800; 41,769,821; 41,770,065; and 41,770,083). The mutations predicted as clonal are shown in green and subclonal in purple. (F) Summary table of proportion of mutated samples in each melanoma cohort.

**A** Examples of CRISPR-Cas9 mutational spectrum for SNV4

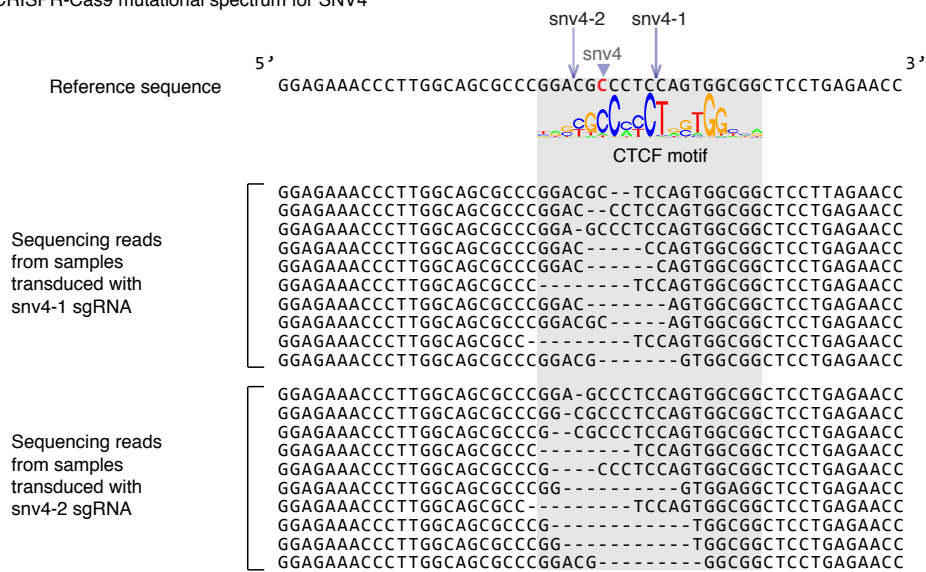

**B** Examples of CRISPR-Cas9 mutational spectrum for SNV8

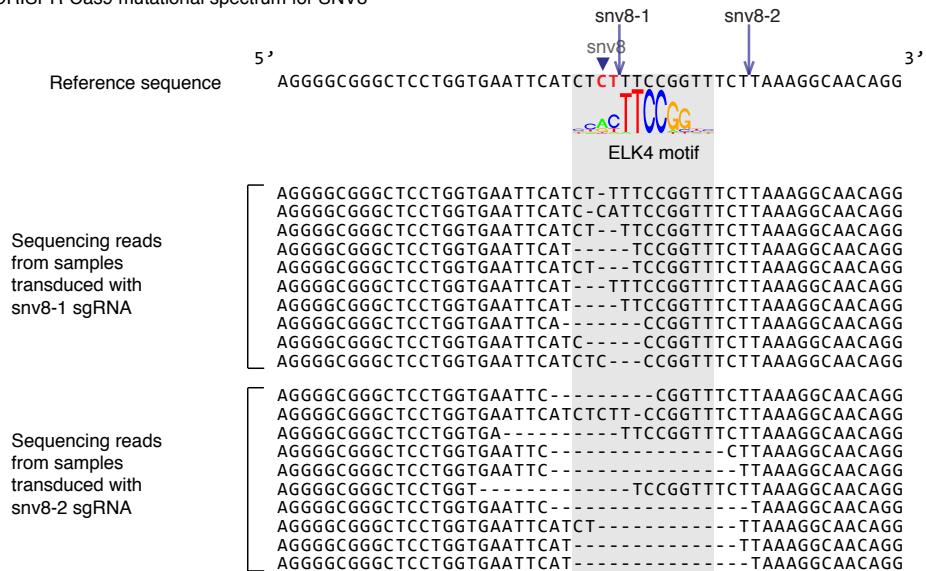

**Figure S13. Deep sequencing of indel mutations at each CRISPR guided RNA target site, Related to Figure 3**

(A-B) We targeted two mutations (SNV4 and SNV8) in the chr19 insulator and designed 2 sgRNAs for each. We performed deep sequencing to determine the resulting indel distribution of each sgRNA. (A) sgRNAs SNV4-1 and SNV4-2 target SNV4 located in a CTCF motif. (B) sgRNAs SNV8-1 and SNV8-2 target SNV8 which is located in an ELK4 motif.
